# Supplementary material
Source: PubMed Central journal article supplement (PMC4059273)
Supplement: pr5000686_si_001.pdf [file pr5000686_si_001.pdf]

### Supporting information for Pontoizeau et al.

#### *Metabolomics analysis uncovers that dietary restriction buffers metabolic changes associated to aging in Caenorhabditis elegans*

**Table S1.** Metabolite variations with age in WT, *slcf-1(tm2258)* and *eat-2(ad465)*.

| Metabolite     | Chemical Shift (ppm) and multiplicity | WT: A7 vs YA <sup>a</sup> | P <sup>b</sup> | <i>slcf-1</i> : A7 vs YA <sup>a</sup> | P <sup>b</sup> | <i>eat-2</i> : A7 vs YA <sup>a</sup> | P <sup>b</sup> |
|----------------|---------------------------------------|---------------------------|----------------|---------------------------------------|----------------|--------------------------------------|----------------|
| Alanine        | 1.48 (d)                              | ↓                         | 5.82E-07       | ns                                    | 1.00E+00       | ns                                   | 8.42E-01       |
| Betaine        | 3.27 (s)                              | ns                        | 2.29E-01       | ns                                    | 1.00E+00       | ns                                   | 6.57E-01       |
| Choline        | 3.204 (s)                             | ns                        | 1.00E+00       | ns                                    | 1.00E+00       | ↑                                    | 2.92E-02       |
| Cystathionine  | 3.145 (m)                             | ↓                         | 2.00E-40       | ↓                                     | 1.96E-10       | ↓                                    | 3.07E-06       |
| Formate        | 8.46 (s)                              | ↓                         | 1.82E-11       | ↓                                     | 1.96E-10       | ns                                   | 8.42E-01       |
| GPC            | 3.235 (s)                             | ↑                         | 2.28E-28       | ↑                                     | 5.50E-14       | ↑                                    | 2.01E-03       |
| Glutamate      | 2.355 (m)                             | ↓                         | 3.87E-11       | ↓                                     | 3.38E-04       | ns                                   | 9.01E-02       |
| Glutamine      | 2.465 (m)                             | ↑                         | 1.44E-07       | ↑                                     | 4.89E-03       | ns                                   | 1.00E+00       |
| Isoleucine     | 1.015 (d)                             | ↓                         | 1.12E-24       | ↓                                     | 5.08E-11       | ns                                   | 7.38E-01       |
| Leucine        | 0.96 (d)                              | ↓                         | 6.99E-18       | ↓                                     | 5.08E-11       | ↓                                    | 2.92E-02       |
| Lysine         | 3.025 (t)                             | ↓                         | 1.22E-30       | ↓                                     | 6.33E-09       | ↓                                    | 6.25E-04       |
| Phenylalanine  | 7.43 (t)                              | ↓                         | 5.83E-09       | ↓                                     | 5.41E-03       | ns                                   | 1.00E+00       |
| Phosphocholine | 3.225 (s)                             | ↑                         | 1.85E-28       | ↑                                     | 1.77E-08       | ↑                                    | 8.65E-04       |
| Succinate      | 2.41 (s)                              | ns                        | 1.00E+00       | ns                                    | 3.03E-01       | ns                                   | 1.00E+00       |
| Tyrosine       | 7.20 (d)                              | ↓                         | 2.11E-08       | ns                                    | 2.00E-01       | ns                                   | 1.00E+00       |
| Trehalose      | 5.20 (d)                              | ns                        | 4.13E-01       | ↑                                     | 8.20E-05       | ↑                                    | 2.92E-02       |
| Valine         | 1.045 (d)                             | ↓                         | 8.47E-23       | ↓                                     | 1.01E-09       | ns                                   | 8.42E-01       |
| Arginine       | 3.246 (t)                             | ↓                         | 2.46E-20       | ↓                                     | 4.56E-02       | ns                                   | 1.80E-01       |
| Acetate        | 1.92 (s)                              | ↓                         | 2.39E-09       | ↓                                     | 2.50E-04       | ns                                   | 5.33E-01       |
| Lactate        | 1.33 (d)                              | ↓                         | 4.86E-13       | ns                                    | 6.69E-01       | ns                                   | 2.14E-01       |
| Glycerol       | 3.56 (m)                              | ↓                         | 1.47E-13       | ↓                                     | 2.25E-06       | ns                                   | 1.00E+00       |
| Glycine        | 3.56 (s)                              | ↑                         | 6.39E-18       | ↑                                     | 2.96E-07       | ns                                   | 1.80E-01       |

<sup>a</sup>↑: increase in metabolite concentration with age; ↓: decrease in metabolite concentration with age; ns: non significant metabolite variation. <sup>b</sup>P-values obtained an unpaired two-tailed t-test, corrected with the Benjamini-Yekutieli method for multiple testing. P-values < 0.05 are significant. YA: young adult; A7: adult.

**Table S2.** Goodness-of-fit parameter values for the OPLS models discriminating young adults and adults for WT, *slcf-1(tm2258)* and *eat-2(ad465)* and for each age, discriminating WT from *slcf-1(tm2258)* or *eat-2(ad465)* .

| OPLS model               | Number of orthogonal components | R <sup>2</sup> X | R <sup>2</sup> Y | Q <sup>2</sup> |
|--------------------------|---------------------------------|------------------|------------------|----------------|
| WT: YA vs A7             | 3                               | 0.846            | 0.978            | 0.956          |
| <i>slcf-1</i> : YA vs A7 | 3                               | 0.794            | 0.97             | 0.934          |
| <i>eat-2</i> : YA vs A7  | 2                               | 0.728            | 0.978            | 0.934          |
| YA: WT vs <i>slcf-1</i>  | 5                               | 0.827            | 0.987            | 0.96           |
| A7: WT vs <i>slcf-1</i>  | 4                               | 0.903            | 0.985            | 0.947          |
| YA: WT vs <i>eat-2</i>   | 2                               | 0.759            | 0.963            | 0.933          |
| A7: WT vs <i>eat-2</i>   | 1                               | 0.868            | 0.955            | 0.94           |

YA: 1-day old young adult; A7: 7-day old adult.

**Table S3.** Metabolite variations between WT and long-lived mutants *slcf-1(tm2258)* or *eat-2(ad465)* in young adults and 7 day-old adults.

| Metabolite     | Chemical Shift (ppm) and multiplicity | YA: <i>slcf-1</i> vs WT <sup>a</sup> | P <sup>b</sup> | A7: <i>slcf-1</i> vs WT <sup>a</sup> | P <sup>b</sup> | YA: <i>eat-2</i> vs WT <sup>a</sup> | P <sup>b</sup> | A7: <i>eat-2</i> vs WT <sup>a</sup> | P <sup>b</sup> |
|----------------|---------------------------------------|--------------------------------------|----------------|--------------------------------------|----------------|-------------------------------------|----------------|-------------------------------------|----------------|
| Alanine        | 1.48 (d)                              | ns                                   | 1.68E-01       | ↑                                    | 2.27E-06       | ns                                  | 4.34E-01       | ns                                  | 1.00E+00       |
| Betaine        | 3.27 (s)                              | ↓                                    | 5.05E-04       | ns                                   | 1.00E+00       | ns                                  | 1.00E+00       | ns                                  | 4.67E-01       |
| Choline        | 3.204 (s)                             | ↑                                    | 3.65E-03       | ↑                                    | 7.79E-03       | ns                                  | 2.05E-01       | ns                                  | 1.29E-01       |
| Cystathionine  | 3.145 (m)                             | ↑                                    | 5.85E-03       | ↑                                    | 8.79E-07       | ↑                                   | 2.67E-11       | ↑                                   | 2.13E-20       |
| Formate        | 8.46 (s)                              | ns                                   | 1.00E+00       | ns                                   | 6.98E-02       | ↓                                   | 4.01E-10       | ↓                                   | 4.59E-06       |
| GPC            | 3.235 (s)                             | ns                                   | 1.00E+00       | ns                                   | 3.91E-01       | ↓                                   | 1.09E-04       | ↓                                   | 1.22E-12       |
| Glutamate      | 2.355 (m)                             | ns                                   | 1.00E+00       | ns                                   | 8.72E-02       | ↑                                   | 5.55E-12       | ↑                                   | 3.78E-15       |
| Glutamine      | 2.465 (m)                             | ns                                   | 8.03E-01       | ns                                   | 1.00E+00       | ↑                                   | 3.75E-11       | ↑                                   | 2.38E-08       |
| Isoleucine     | 1.015 (d)                             | ↓                                    | 3.26E-03       | ns                                   | 1.00E+00       | ↓                                   | 1.76E-10       | ns                                  | 1.00E+00       |
| Leucine        | 0.96 (d)                              | ns                                   | 2.81E-01       | ↓                                    | 2.92E-04       | ↓                                   | 4.38E-10       | ↓                                   | 8.07E-08       |
| Lysine         | 3.025 (t)                             | ↑                                    | 6.47E-14       | ↑                                    | 3.08E-19       | ↑                                   | 2.04E-06       | ↑                                   | 2.13E-20       |
| Phenylalanine  | 7.43 (t),                             | ns                                   | 1.68E-01       | ↑                                    | 7.79E-03       | ↓                                   | 3.07E-05       | ns                                  | 9.41E-01       |
| Phosphocholine | 3.225 (s)                             | ↓                                    | 3.65E-03       | ↓                                    | 1.68E-07       | ↓                                   | 1.94E-05       | ↓                                   | 1.78E-14       |
| Succinate      | 2.41 (s)                              | ↑                                    | 2.29E-03       | ns                                   | 1.00E+00       | ↑                                   | 3.18E-10       | ↑                                   | 9.08E-08       |
| Tyrosine       | 7.20 (d)                              | ns                                   | 1.00E+00       | ns                                   | 9.81E-02       | ↓                                   | 2.01E-05       | ns                                  | 1.00E+00       |
| Trehalose      | 5.20 (d)                              | ↓                                    | 4.74E-17       | ↓                                    | 2.17E-03       | ↓                                   | 3.55E-11       | ↓                                   | 5.29E-10       |
| Valine         | 1.045 (d)                             | ↓                                    | 1.42E-02       | ns                                   | 1.00E+00       | ↓                                   | 5.55E-12       | ns                                  | 4.42E-01       |
| Arginine       | 3.246 (t)                             | ns                                   | 1.60E-01       | ↑                                    | 2.27E-06       | ↓                                   | 1.21E-03       | ↑                                   | 2.50E-10       |
| Acetate        | 1.92 (s)                              | ns                                   | 1.00E+00       | ns                                   | 1.00E+00       | ↓                                   | 2.78E-10       | ns                                  | 9.41E-01       |
| Lactate        | 1.33 (d)                              | ↓                                    | 7.50E-05       | ns                                   | 1.00E+00       | ↓                                   | 2.61E-10       | ns                                  | 6.06E-01       |
| Glycerol       | 3.56 (m)                              | ns                                   | 6.74E-02       | ns                                   | 1.00E+00       | ↓                                   | 2.32E-05       | ns                                  | 1.00E+00       |
| Glycine        | 3.56 (s)                              | ns                                   | 8.80E-01       | ns                                   | 1.00E+00       | ↑                                   | 8.21E-05       | ns                                  | 1.00E+00       |

<sup>a</sup>↑: increase in metabolite concentration in long-lived mutant (*slcf-1* or *eat-2*) by comparison to WT; ↓: decrease in metabolite concentration in long-lived mutant (*slcf-1* or *eat-2*) by comparison to WT; ns: non significant metabolite variation. <sup>b</sup>P-values obtained an unpaired two-tailed t-test, corrected with the Benjamini-Yekutieli method for multiple testing. P-values < 0.05 are significant. YA: young adult; A7: adult.

**Table S4.** Metabolite variations with age in *daf-18(e1375)* mutants and *daf-18(e1375); slcf-1(tm2258)* double mutants.

| Metabolite     | Chemical Shift (ppm) and multiplicity | <i>daf-18</i> : A7 vs YA <sup>a</sup> | P <sup>b</sup> | <i>daf-18; slcf-1</i> : A7 vs YA <sup>a</sup> | P <sup>b</sup> |
|----------------|---------------------------------------|---------------------------------------|----------------|-----------------------------------------------|----------------|
| Alanine        | 1.48 (d)                              | ↓                                     | 1.92E-08       | ↓                                             | 1.03E-06       |
| Betaine        | 3.27 (s)                              | ↓                                     | 9.63E-03       | ↑                                             | 1.44E-04       |
| Choline        | 3.204 (s)                             | ↑                                     | 6.74E-05       | ↑                                             | 1.82E-06       |
| Cystathionine  | 3.145 (m)                             | ↓                                     | 9.63E-03       | ↑                                             | 4.37E-05       |
| Formate        | 8.46 (s)                              | ↓                                     | 3.92E-10       | ↓                                             | 4.29E-08       |
| GPC            | 3.235 (s)                             | ↑                                     | 2.66E-08       | ↑                                             | 1.12E-11       |
| Glutamate      | 2.355 (m)                             | ns                                    |                | ns                                            |                |
| Glutamine      | 2.465 (m)                             | ↑                                     | 1.48E-07       | ↑                                             | 2.33E-08       |
| Isoleucine     | 1.015 (d)                             | ↓                                     | 1.33E-13       | ↓                                             | 3.54E-11       |
| Leucine        | 0.96 (d)                              | ↓                                     | 8.53E-11       | ↓                                             | 3.10E-12       |
| Lysine         | 3.025 (t)                             | ↑                                     | 3.34E-02       | ↓                                             | 1.82E-06       |
| Phenylalanine  | 7.43 (t),                             | ↓                                     | 1.37E-07       | ↓                                             | 1.88E-07       |
| Phosphocholine | 3.225 (s)                             | ↑                                     | 4.24E-06       | ↑                                             | 4.50E-24       |
| Succinate      | 2.41 (s)                              | ↑                                     | 1.69E-06       | ↑                                             | 1.19E-13       |
| Tyrosine       | 7.20 (d)                              | ns                                    |                | ns                                            |                |
| Trehalose      | 5.20 (d)                              | ↓                                     | 1.09E-04       | ↑                                             | 1.38E-06       |
| Valine         | 1.045 (d)                             | ↓                                     | 1.01E-12       | ↓                                             | 1.09E-10       |
| Arginine       | 3.246 (t)                             | ns                                    |                | ↓                                             |                |
| Acetate        | 1.92 (s)                              | ↓                                     | 2.06E-07       | ↓                                             | 8.64E-07       |
| Lactate        | 1.33 (d)                              | ↓                                     | 3.22E-05       | ↓                                             | 4.88E-16       |
| Glycerol       | 3.56 (m)                              | ↓                                     | 2.06E-07       | ↓                                             | 1.63E-08       |
| Glycine        | 3.56 (s)                              | ns                                    |                | ns                                            |                |

<sup>a</sup>↑: increase in metabolite concentration with age; ↓: decrease in metabolite concentration with age; ns: non significant metabolite variation. <sup>b</sup>P-values obtained with an unpaired two-tailed t-test, corrected with the Benjamini-Yekutieli method for multiple testing. P-values < 0.05 are significant. YA: young adult; A7: adult. Acetate, lactate, glycerol and glycine p-values are not reliable due to signal overlaps.

**Table S5.** Metabolite variations between WT and *daf-18(e1375)* or *daf-18(e1375); slcf-1(tm2258)* in young adults and adults.

| Metabolite     | YA:<br><i>daf-18<sup>a</sup></i><br>vs WT <sup>a</sup> | P <sup>b</sup> | A7:<br><i>daf-18</i> vs<br>WT <sup>a</sup> | P <sup>b</sup> | YA:<br><i>slcf-1; daf-18</i> vs<br><i>slcf-1<sup>a</sup></i> | P <sup>b</sup> | A7:<br><i>slcf-1; daf-18</i> vs<br><i>slcf-1<sup>a</sup></i> | P <sup>b</sup> |
|----------------|--------------------------------------------------------|----------------|--------------------------------------------|----------------|--------------------------------------------------------------|----------------|--------------------------------------------------------------|----------------|
| Alanine        | ↑                                                      | 2.21E-08       | ↓                                          | 4.27E-03       | ns                                                           | 1.00E+00       | ↓                                                            | 1.61E-11       |
| Betaine        | ns                                                     | 4.09E-01       | ns                                         | 1.00E+00       | ns                                                           | 1.00E+00       | ↑                                                            | 1.35E-02       |
| Choline        | ns                                                     | 1.00E+00       | ↑                                          | 4.57E-08       | ns                                                           | 7.20E-01       | ↑                                                            | 1.54E-06       |
| Cystathionine  | ns                                                     | 1.00E+00       | ↑                                          | 7.29E-14       | ns                                                           | 1.00E+00       | ↑                                                            | 2.93E-14       |
| Formate        | ns                                                     | 1.00E+00       | ↓                                          | 3.30E-07       | ns                                                           | 2.03E-01       | ↓                                                            | 9.55E-08       |
| GPC            | ns                                                     | 1.00E+00       | ns                                         | 4.95E-01       | ns                                                           | 5.19E-01       | ↓                                                            | 3.03E-07       |
| Glutamate      | ns                                                     | 1.00E+00       | ↑                                          | 2.00E-05       | ↓                                                            | 3.48E-04       | ns                                                           | 5.72E-01       |
| Glutamine      | ↓                                                      | 2.20E-02       | ↑                                          | 1.25E-03       | ns                                                           | 5.19E-01       | ↑                                                            | 4.06E-03       |
| Isoleucine     | ↑                                                      | 3.26E-02       | ↑                                          | 4.74E-02       | ns                                                           | 5.19E-01       | ns                                                           | 1.38E-01       |
| Leucine        | ↑                                                      | 1.72E-03       | ↑                                          | 2.56E-03       | ↑                                                            | 3.66E-02       | ↑                                                            | 6.65E-05       |
| Lysine         | ↑                                                      | 2.54E-03       | ↑                                          | 9.91E-11       | ns                                                           | 1.00E+00       | ns                                                           | 1.00E+00       |
| Phenylalanine  | ↑                                                      | 4.20E-03       | ↑                                          | 2.00E-05       | ns                                                           | 8.54E-01       | ns                                                           | 6.42E-01       |
| Phosphocholine | ns                                                     | 5.39E-01       | ↑                                          | 3.30E-07       | ns                                                           | 1.00E+00       | ↑                                                            | 3.93E-26       |
| Succinate      | ns                                                     | 5.11E-02       | ↑                                          | 1.22E-13       | ns                                                           | 1.21E-01       | ↑                                                            | 3.11E-14       |
| Tyrosine       | ns                                                     | 4.75E-01       | ↑                                          | 2.46E-08       | ns                                                           | 2.03E-01       | ↑                                                            | 2.24E-06       |
| Trehalose      | ↓                                                      | 2.96E-04       | ↓                                          | 1.54E-09       | ns                                                           | 8.83E-01       | ↓                                                            | 4.58E-05       |
| Valine         | ↑                                                      | 4.94E-03       | ns                                         | 1.00E+00       | ns                                                           | 1.00E+00       | ns                                                           | 1.00E+00       |
| Arginine       | ↑                                                      | 1.53E-04       | ↑                                          | 4.01E-06       | ↑                                                            | 3.66E-02       | ↓                                                            | 1.21E-06       |
| Acetate        | ↑                                                      | 1.54E-04       | ↑                                          | 1.37E-07       | ns                                                           | 1.00E+00       | ns                                                           | 1.00E+00       |
| Lactate        | ns                                                     | 1.00E+00       | ↓                                          | 3.07E-19       | ↑                                                            | 2.19E-02       | ↓                                                            | 3.51E-17       |
| Glycerol       | ↓                                                      | 1.96E-03       | ↓                                          | 4.52E-05       | ns                                                           | 5.19E-01       | ↓                                                            | 2.34E-04       |
| Glycine        | ↑                                                      | 3.79E-02       | ↑                                          | 1.85E-02       | ns                                                           | 1.00E+00       | ns                                                           | 1.00E+00       |

<sup>a</sup>↑: increase in metabolite concentration in *daf-18* or *daf-18; slcf-1* by comparison to WT or *slcf-1*; ↓: decrease in metabolite concentration in *daf-18* or *daf-18; slcf-1* by comparison to WT or *slcf-1*; ns: non significant metabolite variation. <sup>b</sup>P-values obtained with an unpaired two-tailed t-test, corrected with the Benjamini-Yekutieli method for multiple testing. P-values < 0.05 are significant. YA: young adult; A7: adult. Acetate, lactate, glycerol and glycine p-values are not reliable due to signal overlaps.

**Table S6.** Wild-type and mutants average lifespans and corresponding phosphocholine levels

| Genotype                             | Average lifespan | Number of worms | Relative phosphocholine level (age) |
|--------------------------------------|------------------|-----------------|-------------------------------------|
| wild-type                            | 17,4             | 928             | 1,93E-03 (YA)<br>3,77E-03(A7)       |
| <i>slcf-1(tm2258)</i>                | 22,8             | 988             | 1,59E-03(YA)<br>2,81E-03(A7)        |
| <i>daf-18(e1375); slcf-1(tm2258)</i> | 13,7             | 190             | 1,61E-03(YA)<br>9,50E-03(A7)        |
| <i>daf-18(e1375)</i>                 | 12,8             | 68              | 1,76E-03(YA)<br>5,94E-03(A7)        |
| <i>eat-2(ad465)</i>                  | 25,6             | 223             | 1,45E-03(YA)<br>1,95E-03(A7)        |

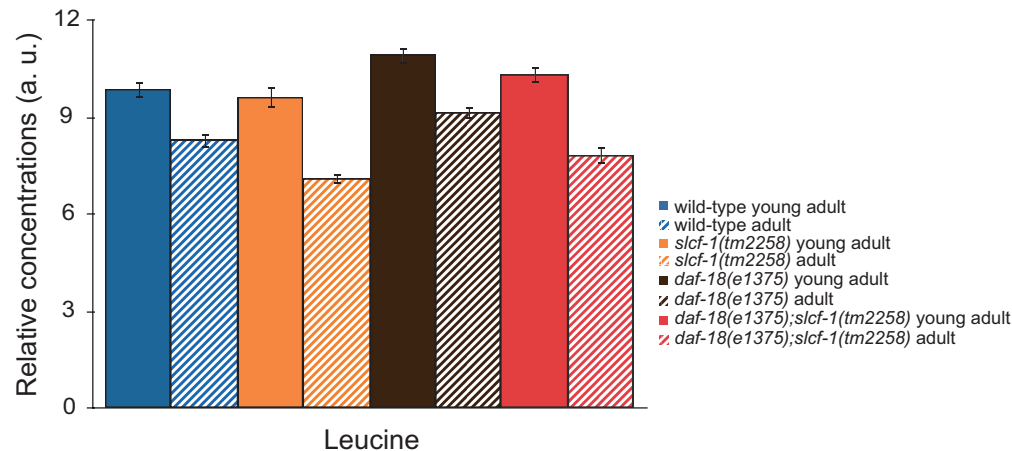**Figure S1.** Relative concentrations in arbitrary units of leucine in young and 7 day-old adults WT, *slcf-1(tm2258)*, *daf-18(e1375)* and *daf-18(e1375);slcf-1(tm2258)* double mutants. Results are reported with means and 95% confidence intervals.
